# Supplementary material for: Canagliflozin Inhibited the Activity of Hemolysin and Reduced the Inflammatory Response Caused by Streptococcus suis
Source: MDPI journal article supplement (doi:10.3390/ijms241713074), 2023-08-22
Supplement: s1 [file s1]

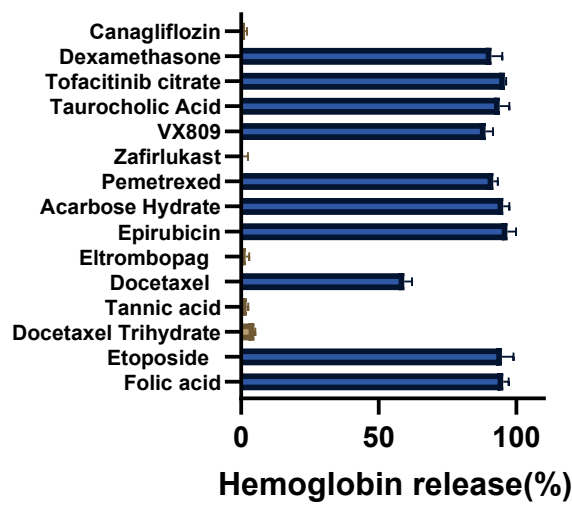

**Figure S1.** A screening was performed to identify compounds with >50% inhibition of SLY protein hemolysis at a concentration of 64  $\mu\text{g/mL}$

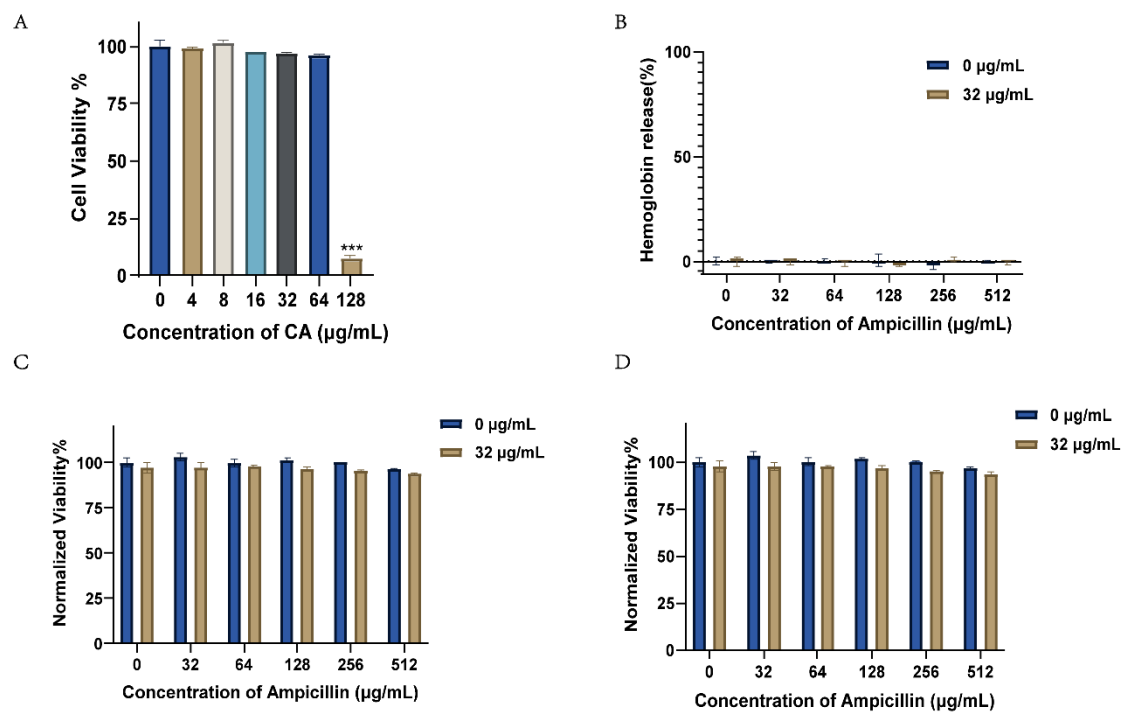

**Figure S2.** Safety assessment of Canagliflozin. (A) Cytotoxicity of canagliflozin for RAW264.7 \*\*\*  $p < 0.001$  vs. 0  $\mu\text{g/mL}$ ; (B) Hemolytic activity of ampicillin to the RBCs in the absence or presence of canagliflozin; To evaluate Ampicillin cytotoxicity in Vero (C) and RAW264.7 cells (D) in presence of canagliflozin.
